# Supplementary material
Source: Springer Nature journal article supplement (https://www.springermedizin.de/resource/supplementary/13075_2013_4254_MOESM5_ESM.pdf/9696202)

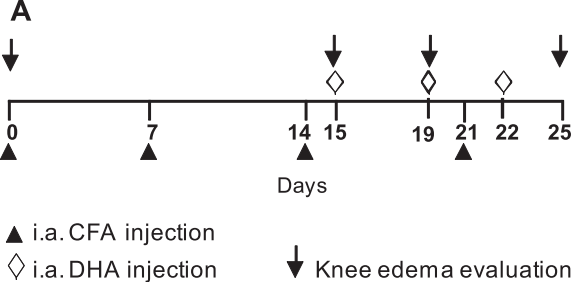

**B Knee edema**

- i.a. CFA + i.a. vehicle (n=9)
- i.a. CFA + i.a. 25  $\mu$ g DHA (n=10)
- i.a. CFA + i.a. 50  $\mu$ g DHA (n=10)
- \*  $p < 0.05$  i.a. CFA + i.a. vehicle

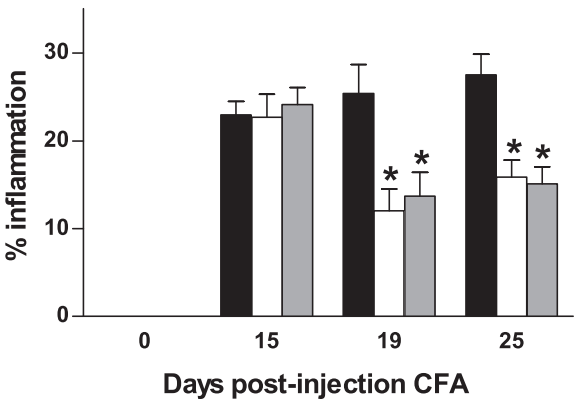

Supplement: MOESM5 [file 9696202]
